# Supplementary material
Source: PubMed Central journal article supplement (PMC4249033)
Supplement: AEM.01883-14_zam999105735so2.pdf [file AEM.01883-14_zam999105735so2.pdf]

## **Characterization of novel PAH dioxygenases from the bacterial metagenomic DNA of a contaminated soil**

Angelina Chemerys<sup>1,2,3</sup>, Eric Pelletier<sup>4,5,6</sup>, Corinne Cruaud<sup>4,5,6</sup>, Florence Martin<sup>1,2,3</sup>, Fabien Violet<sup>1,2,3</sup> and Yves Jouanneau<sup>1,2,3</sup>

<sup>1</sup>CEA, DSV, Laboratoire de Chimie et Biologie des Métaux, F-38054 Grenoble, France.

<sup>2</sup>CNRS UMR 5249, 38054, Grenoble, France.

<sup>3</sup>Univ. Grenoble Alpes, 38042, Grenoble, France

<sup>4</sup>CEA, DSV, Institut de Génomique, Genoscope, 2 rue Gaston Crémieux, F-91057 Evry.

<sup>5</sup>CNRS-UMR 8030 F-91057 Evry, France.

<sup>6</sup>UEVE, Université d'Evry, F-91057 Evry, France

**Table S2 : Sequences potentially coding for RHD components found among the 600 longest contigs**

| Contig     | Length<br>(bp) | Coding sequence <sup>a</sup><br>(length in bp) | Best match in the UniProtKB database |            |                         |             |                           | Comment                                      |
|------------|----------------|------------------------------------------------|--------------------------------------|------------|-------------------------|-------------|---------------------------|----------------------------------------------|
|            |                |                                                | Gene product                         | Accession  | % identity <sup>b</sup> | RHD subunit | Microorganism             |                                              |
| <b>95</b>  | 3041           | Orf95-2 (1026)                                 | PahAa                                | AFH77976.1 | 82                      | Reductase   | Uncultured <sup>c</sup>   | See contig map in Fig. 1                     |
| <b>113</b> | 2818           | Orf113-2 (324)                                 | PahAb                                | AFH77975.1 | 95                      | Ferredoxin  | Uncultured                | See contig map in Fig.1                      |
| <b>204</b> | 2274           | Orf204-2 (570)                                 | Orf                                  | G7UVF1     | 54                      | Beta        | <i>P. spadix</i> BD-a59   | Partial sequence                             |
|            |                | Orf204-3 (1062)                                | PhnA1b                               | Q65AS5     | 60                      | Alpha       | <i>Sphingomonas</i> CHY-1 |                                              |
| <b>332</b> | 1884           | Orf332-2 (507)                                 | PahAd4                               | AFH77970.1 | 82                      | Beta        | Uncultured                | Missing N-ter<br>(cf.contig 763)             |
|            |                | Orf332-3 (561)                                 | PahAc4                               | AFH77962.1 | 87                      | Alpha       |                           |                                              |
| <b>341</b> | 1862           | Orf341-1 (945)                                 | PahAc2                               | AFH77960.1 | 96                      | Alpha       | Uncultured                | Missing N-ter                                |
|            |                | Orf341-2 (507)                                 | PahAd2                               | AFH77968.1 | 85                      | Beta        |                           | (cf. contig 55951)                           |
| <b>427</b> | 1675           | Orf427-1 (1068)                                | PahAc8                               | AFH77966.1 | 92                      | Alpha       | Uncultured                | Mising N-ter                                 |
|            |                | Orf427-2 (531)                                 | PahAd8                               | AFH77974.1 | 87                      | Beta        |                           | (cf. contig 5241)                            |
| <b>451</b> | 1644           | Orf451-1 (1320)                                | PahAc5                               | AFH77963.1 | 92                      | Alpha       | Uncultured                | Missing $\beta$ subunit<br>(cf. contig 3411) |

|             |      |                        |        |            |    |       |                           |                                              |
|-------------|------|------------------------|--------|------------|----|-------|---------------------------|----------------------------------------------|
| <b>550</b>  | 1501 | <i>Orf550-1 (849)</i>  | Orf    | EGD05954.1 | 76 | Alpha | <i>Burkholderia</i> TJI49 | Missing N-ter                                |
| <b>569</b>  | 1471 | Orf569-1 (1332)        | PahAc3 | AFH77961.1 | 94 | alpha | Uncultured                | Missing $\beta$ subunit<br>(cf. contig 2271) |
| <b>763</b>  | 1312 | <i>Orf763-2 (798)</i>  | PahAc4 | AFH77962.1 | 87 | alpha | Uncultured                | Partial sequence                             |
| <b>1214</b> | 1085 | <i>Orf1214-2 (873)</i> | PahAc6 | AFH77964.1 | 93 | Alpha | Uncultured                | Partial sequence                             |
| <b>2271</b> | 862  | <i>Orf2271-1 (639)</i> | PahAd3 | AFH77969.1 | 94 | Beta  | Uncultured                | Partial sequence                             |
| <b>3411</b> | 746  | <i>Orf3411-1 (180)</i> | PahAd5 | AFH77971.1 | 79 | beta  | Uncultured                | Partial sequence                             |

<sup>a</sup> Orfs in italics represent partial gene sequences

<sup>b</sup> Percent amino acid identity between gene product and best match

<sup>c</sup> Uncultured bacteria found in a pyrene-degrading consortium (see main text)

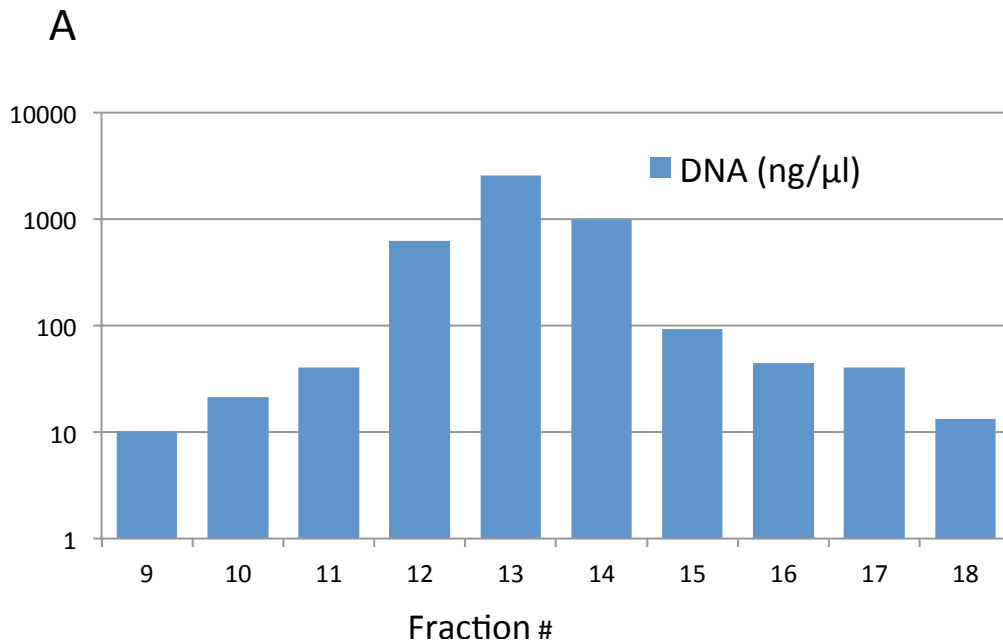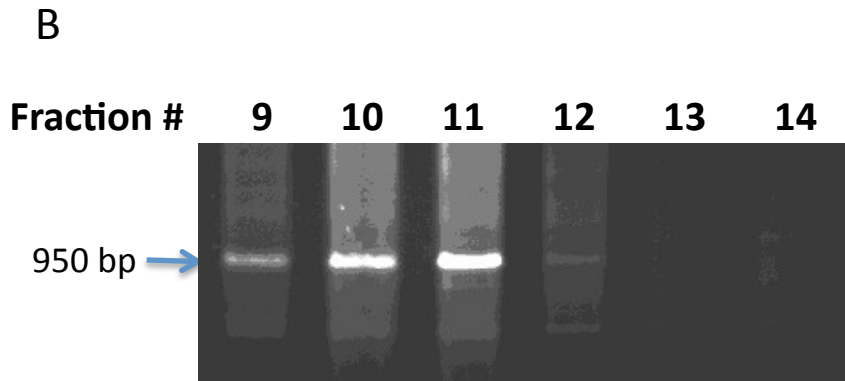

**Figure S1** : Selection of heavy fractions containing labeled DNA after isopycnic centrifugation

**A:** Typical concentration profile of DNA-containing fractions after CsCl gradient centrifugation of soil DNA from SIP experiments. The gradient was fractionated into twenty 160-μl aliquots, from which DNA was precipitated, then taken up in 20 μl of Tris buffer as described in Methods. Concentrations were determined with a Nanodrop apparatus and plotted in log scale. Fractions are numbered from the bottom to the top of the centrifuge tube.

**B:** PCR analysis of central fractions of the gradient. Primers used afforded specific amplification of a 950-bp fragment internal to the RHD alpha subunit genes found in Betaproteobacteria (see Methods for details). Fractions 9-11 were pooled with other selected fractions from similar runs for subsequent DNA sequencing.

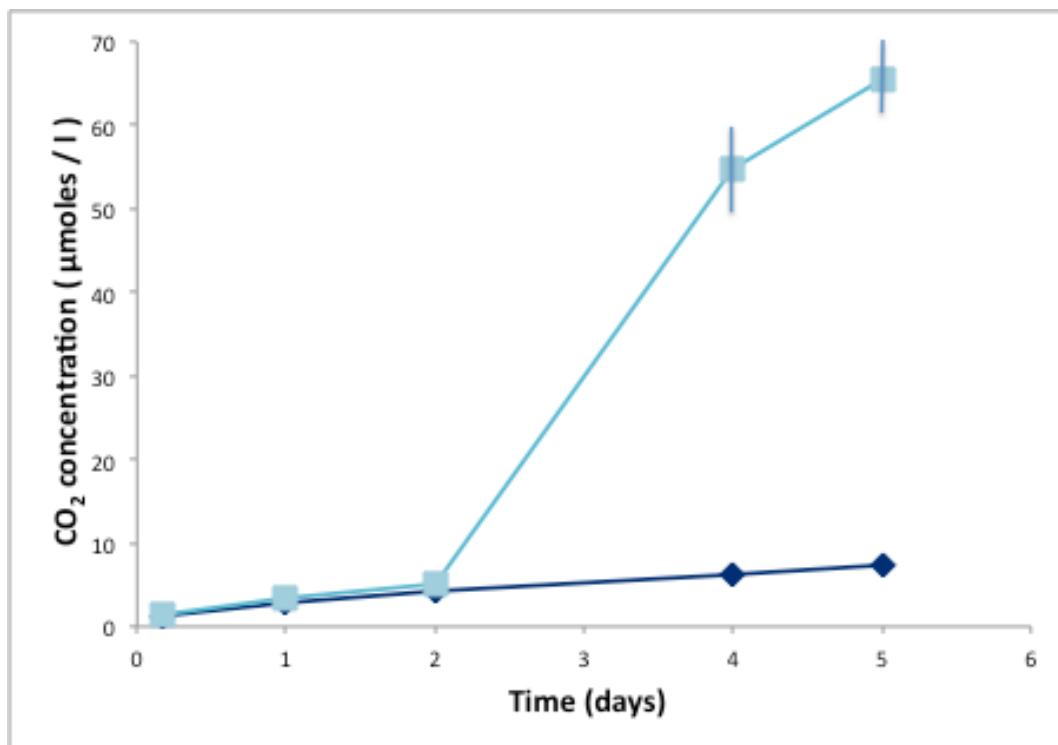

**Figure S2** : Time course of <sup>13</sup>C-phenanthrene mineralization in soil microcosms

<sup>13</sup>CO<sub>2</sub> produced in the headspace of microcosms was estimated by GC/MS. Concentrations are means of determinations made in 5 microcosms supplemented with labeled phenanthrene (squares) or in 2 unamended microcosms (diamonds). Standard deviations are indicated as error bars when greater than symbol size.

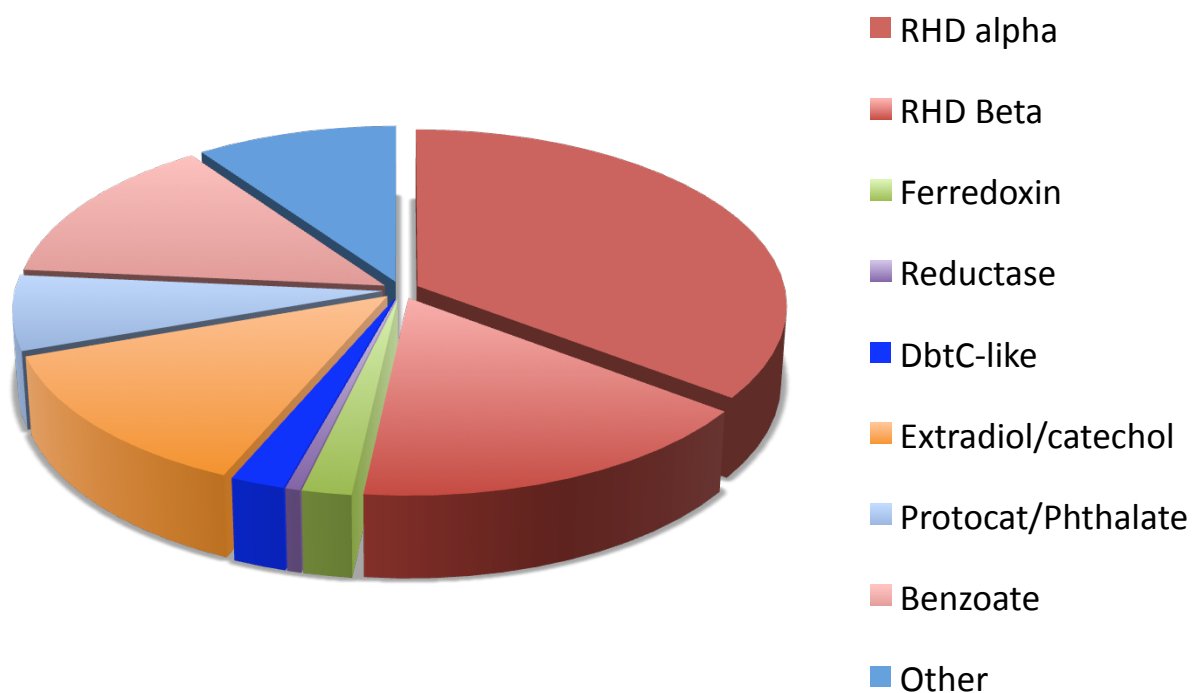

**Figure S3 :** Predicted dioxygenase-related sequences possibly involved in aromatic hydrocarbon metabolism

From the metagenomic data, a total 510 sequences were found to be related to RHD alpha or beta subunits, benzoate dioxygenases, as well as enzymes likely involved in later steps of the aromatic hydrocarbon degradation pathway, such as protocatechuate and phthalate dioxygenases. Ring-cleavage dioxygenases including DbtC-like enzymes thought to attack polycyclic substrates were also identified.
